# Supplementary material for: Synthetic reconstruction of the hunchback promoter specifies the role of Bicoid, Zelda and Hunchback in the dynamics of its transcription
Source: eLife. 2022 Apr 1;11:e74509. doi: 10.7554/eLife.74509 (PMC8975551; doi:10.7554/eLife.74509)
Supplement: Supplementary file 2. — For the fraction of expression nuclei, also shown is the time to reach the final activation decision boundary ( ± 2 %EL) starting from the detection the first spot (~225 s) after mitosis. [file elife-74509-supp2.docx]

# Supplementary File 2

|  | Fraction of expressing nuclei | | | Fraction of active loci  at steady state | | |
| --- | --- | --- | --- | --- | --- | --- |
| Boundary position (%EL) | Boundary width (%EL) | Converging time (s) | Boundary position (%EL) | Boundary width (%EL) | Pattern  Sharpness  (%EL)-1 |
| hb-P2 | 45.0 ± 0.3 | 11.0 ± 1.6 | 225 ± 25 | 40.1 ± 0.4 | 16.8 ± 2.0 | 0.33 ± 0.04 |
| B6 | 37.1 ± 1.0 | 25.6 ± 3.6 | 425± 25 | 34.4 ± 1.0 | 24.7 ± 5.6 | 0.22 ± 0.05 |
| B9 | 44.9 ± 0.4 | 17.6 ± 2.2 | 475± 25 | 42.7 ± 0.5 | 18.9 ± 2.0 | 0.30 ± 0.07 |
| B12 | 45.8 ± 0.5 | 16.4 ± 2.5 | 325 ± 25 | 44.0 ± 0.7 | 19.6 ± 6.9 | 0.29 ± 0.07 |
| H6B6 | 40.2 ± 0.4 | 13.8 ± 1.8 | 325 ± 25 | 36.7 ± 0.4 | 18.9 ± 2.0 | 0.30 ± 0.03 |
| Z2B6 | 54.6 ± 0.7 | 19.4 ± 3.2 | 300 ± 25 | 49.4 ± 1.4 | 19.6 ± 6.9 | 0.29 ± 0.12 |

**Supplementary File 2.** Position and width of the gene expression boundary based on fraction of expression nuclei feature (Figure 1H and Figure 3G) and fraction of active loci feature (Figure 2A and Figure 3H) in the steady window (600-800s into nc13) for hb-P2 and synthetic reporters in Bcd-2X, shown with 95% confidence interval. For the fraction of expression nuclei, also shown is the time to reach the final activation decision boundary (±2 %EL) starting from the detection the first spot (~225 s) after mitosis.
