# Supplementary material for: Synthetic reconstruction of the hunchback promoter specifies the role of Bicoid, Zelda and Hunchback in the dynamics of its transcription
Source: eLife. 2022 Apr 1;11:e74509. doi: 10.7554/eLife.74509 (PMC8975551; doi:10.7554/eLife.74509)
Supplement: Supplementary file 6. — The fold changes are shown for different schemes of activation and values of K (Figure 2—figure supplement 3). The fold changes above the value calculated from the data (~4.5) are made bold. [file elife-74509-supp6.docx]

# Supplementary File 6

| Scheme |  |  |  |
| --- | --- | --- | --- |
| Independent activation |  | 1.5 | 2 |
| Formation of transient *K*-mer |  | 1.5 | 2 |
|  | 2.4 | 4.4 |
|  | 4.2 | **11** |
|  | **8.4** | **33** |
|  | **21** | **132** |
|  | **84** | **924** |
| Formation of stable K-mer |  | 1 | 1 |

**Supplementary File 6.** Expected fold change in the activation rates in the anterior region (saturating Bcd concentration) between B9 and B6 and between B12 and B6. The fold changes are shown for different schemes of activation and values of *K* (Figure 2-figure supplement 3). The fold changes above the value calculated from the data (~4.5) are made bold.
